# Supplementary material for: Functional outcomes after laparoscopic versus robotic-assisted rectal resection: a systematic review and meta-analysis
Source: Springer Nature journal article supplement (doi:10.1007/s00464-019-07361-1), 2020-02-05
Supplement: MOESM1 [file 17633742]

**Author(s):**

**Date:**

**Question:** Robotic-assisted surgery compared to laparoscopic surgery for rectal cancer surgery

**Setting:**

**Bibliography:**

| Certainty assessment                             |                       |              |               |                      |             |                      | N <sub>e</sub> of patients |                      | Effect                           |                                                          | Certainty        | Importance |
|--------------------------------------------------|-----------------------|--------------|---------------|----------------------|-------------|----------------------|----------------------------|----------------------|----------------------------------|----------------------------------------------------------|------------------|------------|
| N <sub>e</sub> of studies                        | Study design          | Risk of bias | Inconsistency | Indirectness         | Imprecision | Other considerations | Robotic-assisted surgery   | laparoscopic surgery | Relative (95% CI)                | Absolute (95% CI)                                        |                  |            |
| <b>Ileus</b>                                     |                       |              |               |                      |             |                      |                            |                      |                                  |                                                          |                  |            |
| 31                                               | observational studies | not serious  | not serious   | not serious          | not serious | none                 | 342/4406 (7.8%)            | 1970/16796 (11.7%)   | <b>OR 0.86</b><br>(0.75 to 0.98) | <b>15 fewer per 1.000</b><br>(from 27 fewer to 2 fewer)  | ⊕⊕○○<br>LOW      |            |
| <b>Urinary retention</b>                         |                       |              |               |                      |             |                      |                            |                      |                                  |                                                          |                  |            |
| 19                                               | observational studies | not serious  | not serious   | not serious          | not serious | strong association   | 56/1844 (3.0%)             | 112/2625 (4.3%)      | <b>OR 0.65</b><br>(0.46 to 0.92) | <b>15 fewer per 1.000</b><br>(from 23 fewer to 3 fewer)  | ⊕⊕⊕○<br>MODERATE |            |
| <b>Sexual function (assessed with: IIEF)</b>     |                       |              |               |                      |             |                      |                            |                      |                                  |                                                          |                  |            |
| 5                                                | observational studies | not serious  | not serious   | serious <sup>a</sup> | not serious | none                 | 92                         | 102                  | -                                | <b>SMD 0.46 SD higher</b><br>(0.13 lower to 1.04 higher) | ⊕○○○<br>VERY LOW |            |
| <b>Urinary symptoms (assessed with: IPSS)</b>    |                       |              |               |                      |             |                      |                            |                      |                                  |                                                          |                  |            |
| 7                                                | observational studies | not serious  | not serious   | serious <sup>a</sup> | not serious | none                 | 257                        | 265                  | -                                | <b>MD 0.6 fewer</b><br>(1.17 fewer to 0.03 fewer)        | ⊕○○○<br>VERY LOW |            |
| <b>Quality of Life (assessed with: QLQ-C-30)</b> |                       |              |               |                      |             |                      |                            |                      |                                  |                                                          |                  |            |
| 3                                                | observational studies | not serious  | not serious   | serious <sup>a</sup> | not serious | none                 | 153                        | 155                  | -                                | <b>MD 2.99 higher</b><br>(2.02 higher to 3.95 higher)    | ⊕○○○<br>VERY LOW |            |

**CI:** Confidence interval; **OR:** Odds ratio; **SMD:** Standardised mean difference; **MD:** Mean difference

**Explanations**

a. subjective questionnaire
