# Supplementary material for: Functional outcomes after laparoscopic versus robotic-assisted rectal resection: a systematic review and meta-analysis
Source: Springer Nature journal article supplement (doi:10.1007/s00464-019-07361-1), 2020-02-05
Supplement: MOESM2 [file 17633742]

## Meta Analysis of Rectal Cancer Studies

November 11, 2019

**Biometrician:** Svenja Seide  
seide@imbi.uni-heidelberg.de

**Contacts:** Laura Seifert  
lauraseifert96@gmail.com

Karl Kowalewski  
karl.kowalewski@googlemail.com

**Data source:** rectal cancer statistic\_neu.xlsx

**Data supplied by:** Karl Kowalewski

**Abstract:** [ToDo]

---

## Contents

|                              |           |
|------------------------------|-----------|
| <b>1 Urinary Retention</b>   | <b>3</b>  |
| <b>2 Ileus</b>               | <b>5</b>  |
| <b>3 QLQ-Scores</b>          | <b>7</b>  |
| 3.1 QLQ-C-29 . . . . .       | 8         |
| 3.2 QLQ-C-30 . . . . .       | 8         |
| <b>4 IIEF Total Scores</b>   | <b>10</b> |
| <b>5 IPSS Total Scores</b>   | <b>11</b> |
| <b>6 Session Information</b> | <b>13</b> |

New names:

- \* 'Abdominal pain post op lap' -> 'Abdominal pain post op lap...34'
- \* 'Abdominal pain post op lap (SD)' -> 'Abdominal pain post op lap (SD)...35'
- \* 'Abdominal pain post op rob' -> 'Abdominal pain post op rob...36'
- \* 'Abdominal pain post op rob (SD)' -> 'Abdominal pain post op rob (SD)...37'
- \* 'Abdominal pain post op lap' -> 'Abdominal pain post op lap...80'
- \* ... and 3 more problems

New names:

- \* 'LAP directly postop (wert)' -> 'LAP directly postop (wert)...18'
- \* 'LAP directly postop (wert)' -> 'LAP directly postop (wert)...19'
- \* 'Postop 3 months rob (wert)' -> 'Postop 3 months rob (wert)...20'
- \* 'Postop 3months rob (Abweichung)' -> 'Postop 3months rob (Abweichung)...21'
- \* 'Postop 3 months rob (wert)' -> 'Postop 3 months rob (wert)...24'
- \* ... and 1 more problem

## 1 Urinary Retention

Robotic treatment (experimental group) compared to laproscopic treatment (control group). Results on the OR-scale (non-logarithmic). In case of 0 events in a study-arm, 0.5 is added to each arm of this study for continuity correction. Assuming that "urinary retention" is an undesirable event,  $OR < 1$  favors Rob, while  $OR > 1$  favors Lab. Studies are sorted by total sample size (from small to large) in the forest plot.

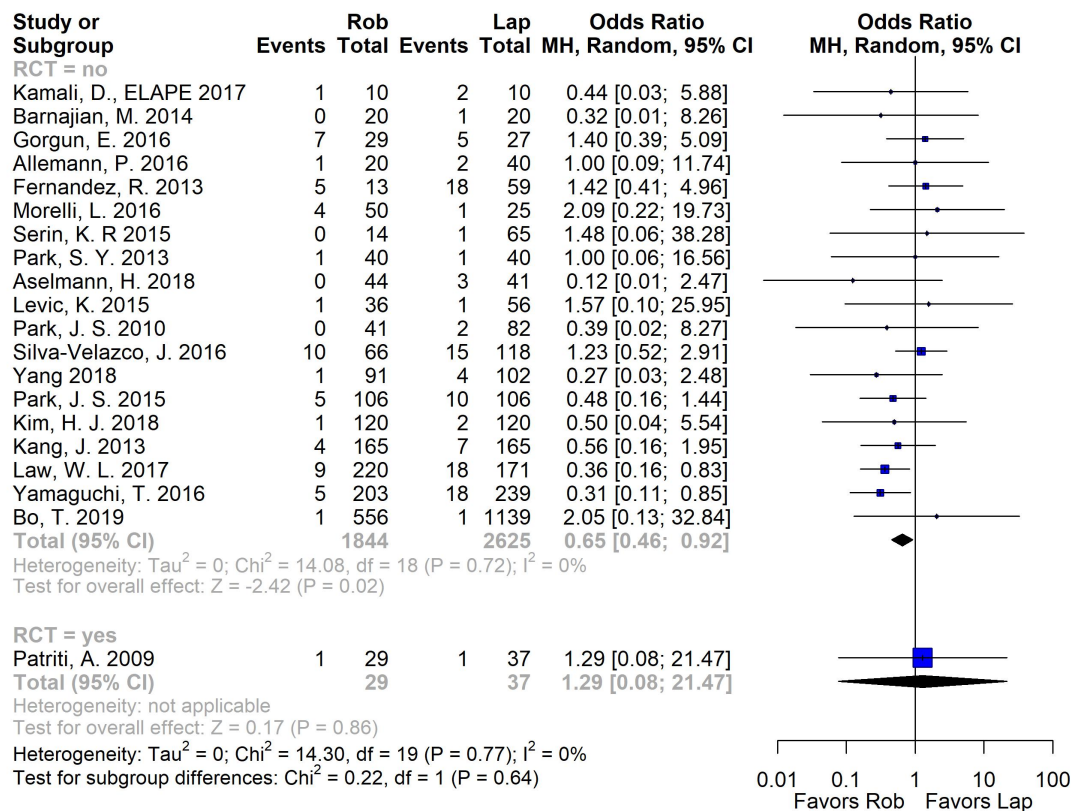

Figure 1: Forest plot for meta-analysis of urinary retention

Number of studies combined:  $k = 20$

|                      | OR     | 95%-CI           | z     | p-value |
|----------------------|--------|------------------|-------|---------|
| Random effects model | 0.6561 | [0.4636; 0.9286] | -2.38 | 0.0174  |

Quantifying heterogeneity:

$\tau^2 = 0$ ;  $H = 1.00$  [1.00; 1.20];  $I^2 = 0.0\%$  [0.0%; 30.8%]

Quantifying residual heterogeneity:

$H = 1.00$  [1.00; 1.24];  $I^2 = 0.0\%$  [0.0%; 34.7%]

Test of heterogeneity:

| Q     | d.f. | p-value |
|-------|------|---------|
| 14.30 | 19   | 0.7659  |

Results for subgroups (random effects model):

|           | k  | OR     | 95%-CI            | Q     | $\tau^2$ | $I^2$ |
|-----------|----|--------|-------------------|-------|----------|-------|
| RCT = no  | 19 | 0.6494 | [0.4576; 0.9215]  | 14.08 | 0        | 0.0%  |
| RCT = yes | 1  | 1.2857 | [0.0770; 21.4725] | 0.00  | --       | --    |

Test for subgroup differences (random effects model):

|                | Q    | d.f. | p-value |
|----------------|------|------|---------|
| Between groups | 0.22 | 1    | 0.6370  |

Details on meta-analytical method:

- Mantel-Haenszel method
- DerSimonian-Laird estimator for  $\tau^2$
- Continuity correction of 0.5 in studies with zero cell frequencies

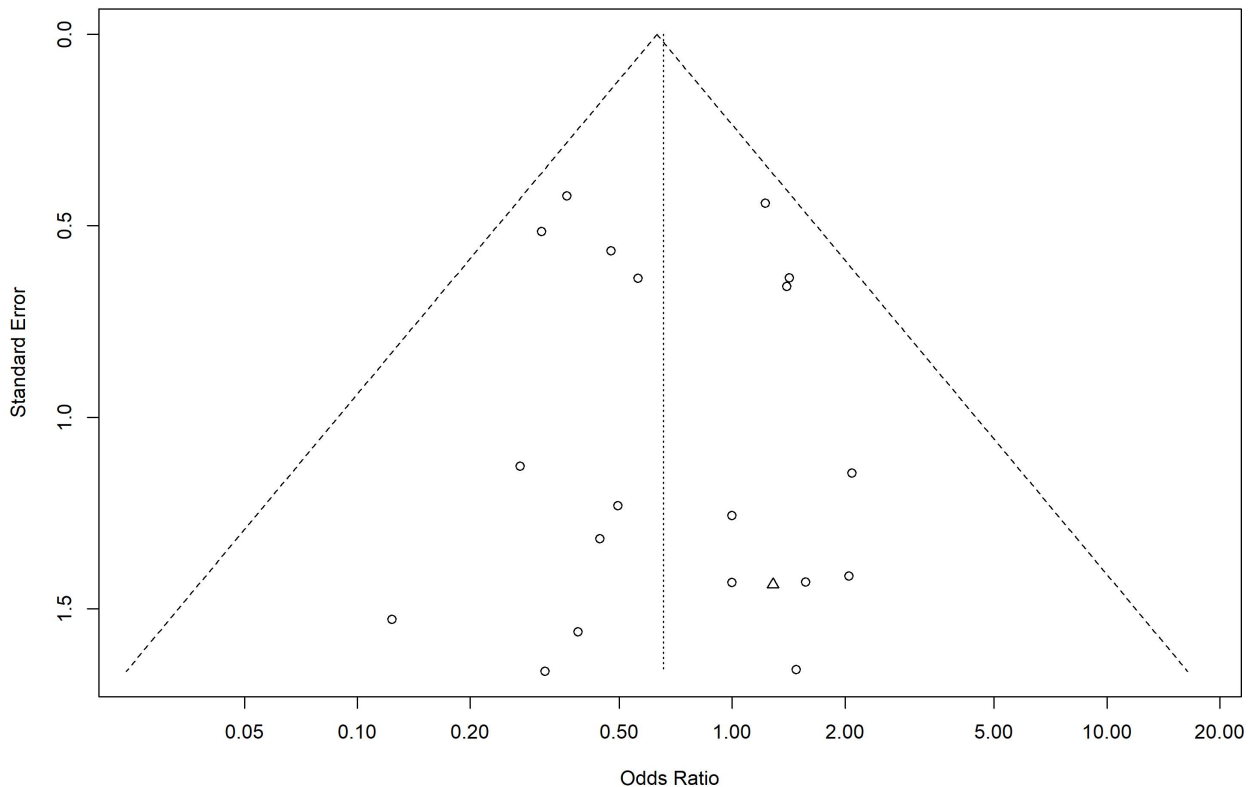

Figure 2: Funnel plot for meta-analysis of urinary retention

## 2 Ileus

Robotic treatment (experimental group) compared to laproscopic treatment (control group). Results on the OR-scale (non-logarithmic). In case of 0 events in a study-arm, 0.5 is added to each arm of this study for continuity correction. Assuming that "ileus" is an undesirable event, OR < 1 favors Rob, while OR > 1 favors Lab. Studies are sorted by total sample size (from small to large) in the forest plot.

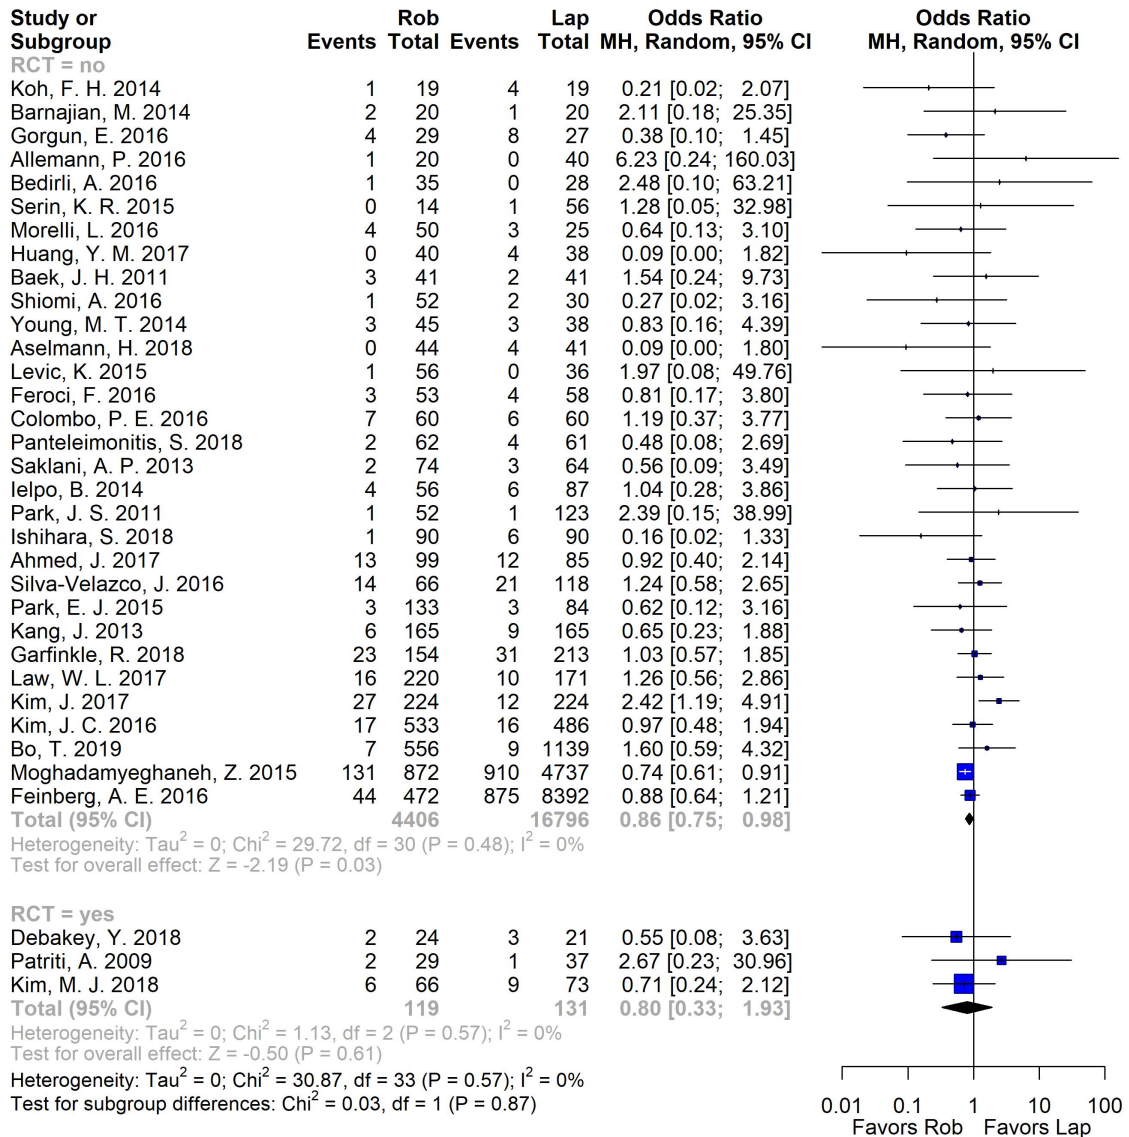

Figure 3: Forest plot for meta-analysis of Ileus

Number of studies combined: k = 34

|                      | OR     | 95%-CI           | z     | p-value |
|----------------------|--------|------------------|-------|---------|
| Random effects model | 0.8578 | [0.7503; 0.9807] | -2.24 | 0.0248  |

Quantifying heterogeneity:

$\tau^2 = 0$ ;  $H = 1.00$  [1.00; 1.24];  $I^2 = 0.0\%$  [0.0%; 34.5%]

Quantifying residual heterogeneity:

$H = 1.00$  [1.00; 1.26];  $I^2 = 0.0\%$  [0.0%; 36.9%]

Test of heterogeneity:

| Q     | d.f. | p-value |
|-------|------|---------|
| 30.87 | 33   | 0.5735  |

Results for subgroups (random effects model):

|           | k  | OR     | 95%-CI           | Q     | $\tau^2$ | $I^2$ |
|-----------|----|--------|------------------|-------|----------|-------|
| RCT = no  | 31 | 0.8593 | [0.7504; 0.9840] | 29.72 | 0        | 0.0%  |
| RCT = yes | 3  | 0.7967 | [0.3297; 1.9253] | 1.13  | 0        | 0.0%  |

Test for subgroup differences (random effects model):

|                | Q    | d.f. | p-value |
|----------------|------|------|---------|
| Between groups | 0.03 | 1    | 0.8681  |

Details on meta-analytical method:

- Mantel-Haenszel method
- DerSimonian-Laird estimator for  $\tau^2$
- Continuity correction of 0.5 in studies with zero cell frequencies

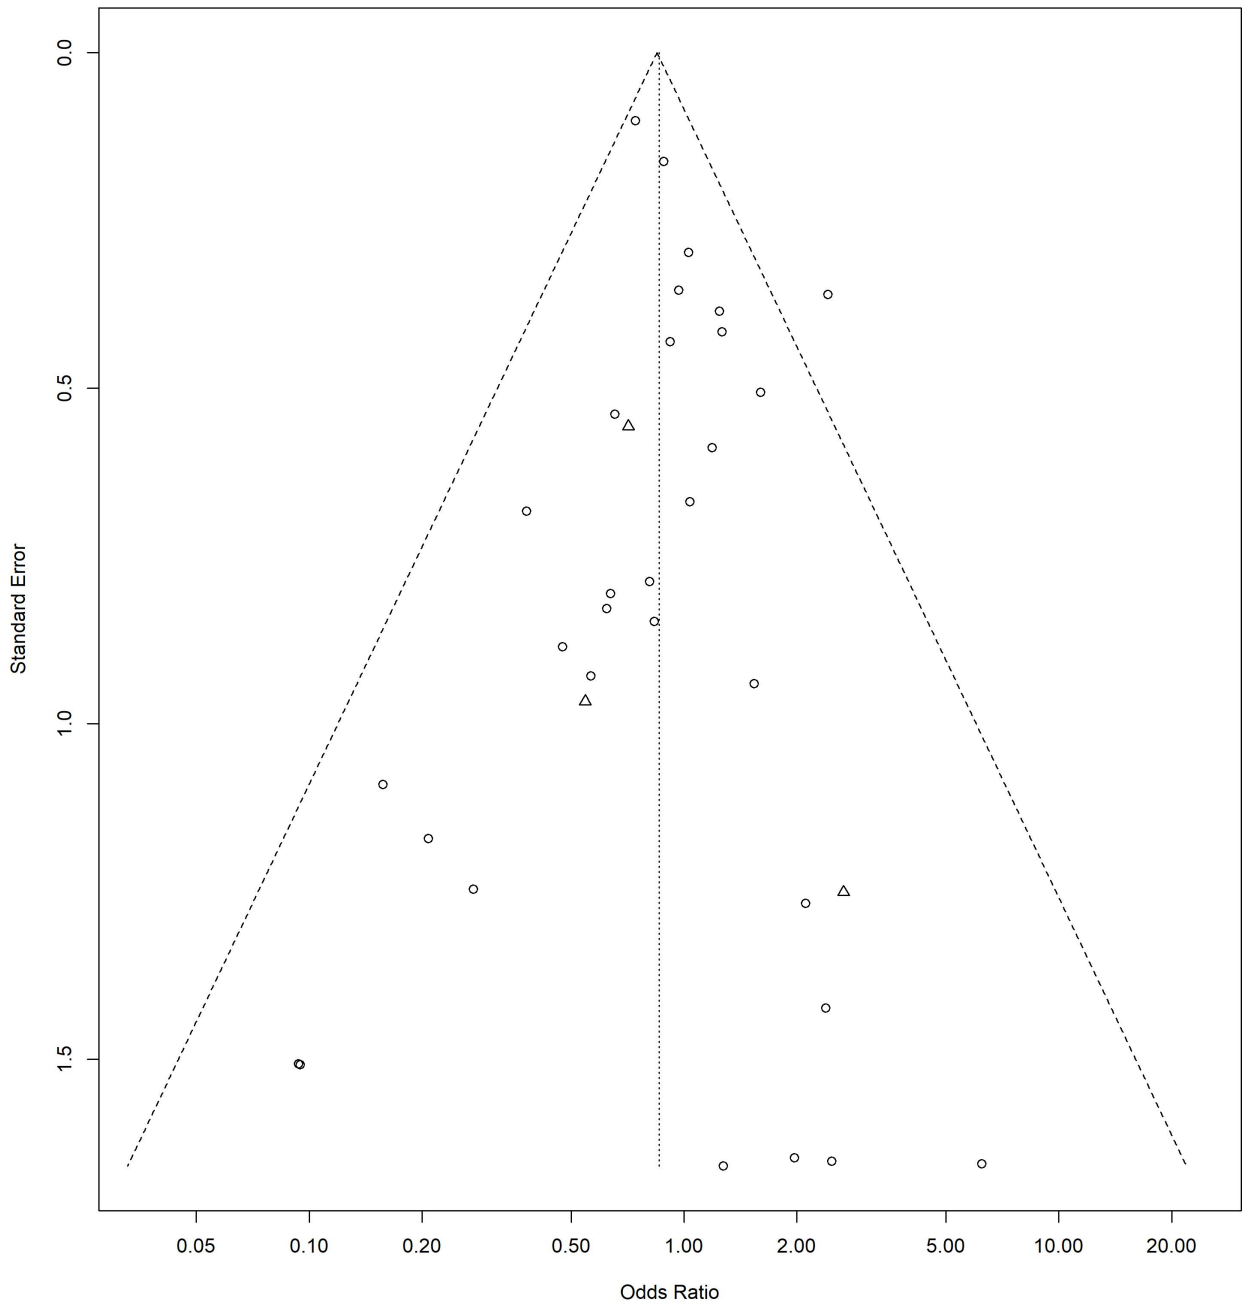

Figure 4: Funnel plot for meta-analysis of Ileus

### 3 QLQ-Scores

Robotic treatment (experimental group) compared to laproscopic treatment (control group). Results as difference in means. Designations in the forest plot assume a higher mean differences to be better in all cases which translates into a higher score being assumed better.

### 3.1 QLQ-C-29

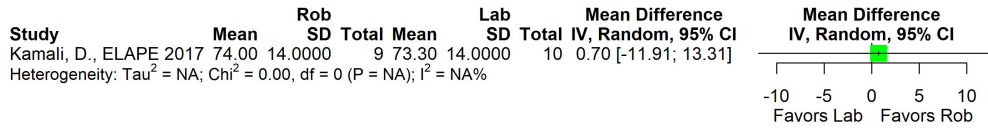

Figure 5: Forest plot for meta-analysis of QLQ-C-29 global health

MD                    95%-CI        z    p-value  
 0.7000 [-11.9076; 13.3076] 0.11  0.9133

Details:

- Inverse variance method

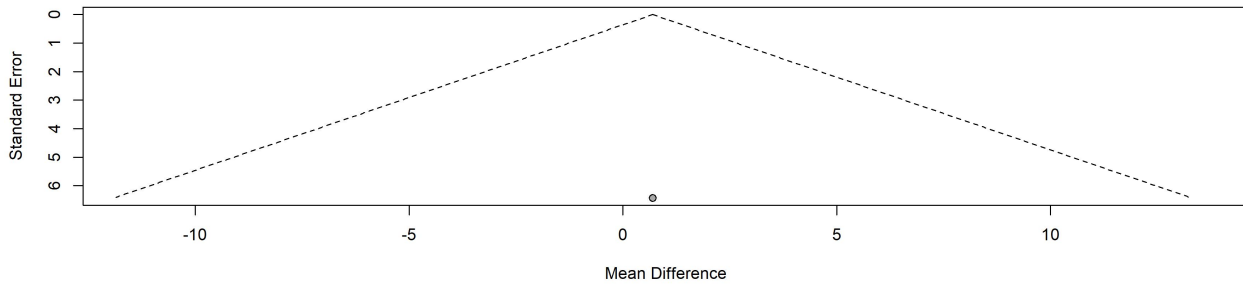

Figure 6: Funnel plot for meta-analysis of QLQ-C-29 global health

### 3.2 QLQ-C-30

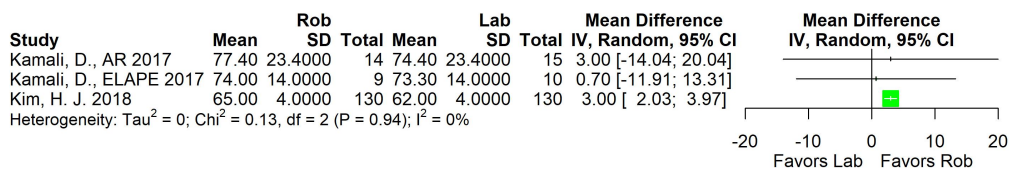

Figure 7: Forest plot for meta-analysis of QLQ-C-30 global health

Number of studies combined: k = 3



MD 95%-CI z p-value  
Random effects model 2.9864 [2.0185; 3.9544] 6.05 < 0.0001

Quantifying heterogeneity:  
 $\tau^2 = 0$ ;  $H = 1.00$  [1.00; 1.00];  $I^2 = 0.0\%$  [0.0%; 0.0%]

Test of heterogeneity:  
Q d.f. p-value  
0.13 2 0.9384

Details on meta-analytical method:  
- Inverse variance method  
- DerSimonian-Laird estimator for  $\tau^2$

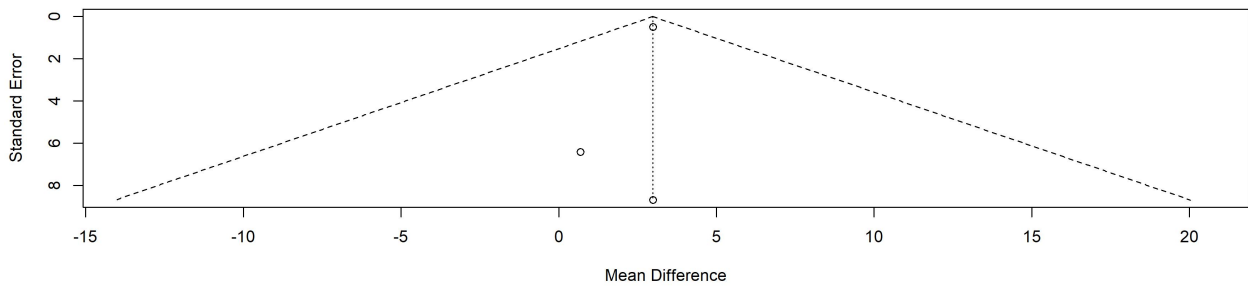

Figure 8: Funnel plot for meta-analysis of QLQ-C-30 global health

## 4 IIEF Total Scores

Robotic treatment (experimental group) compared to laparoscopic treatment (control group). Results as mean differences and assuming a higher score being better. Assuming that the data is asymptotically normal (especially symmetric) in the studies reporting median and range, mean and standard deviation are estimated.

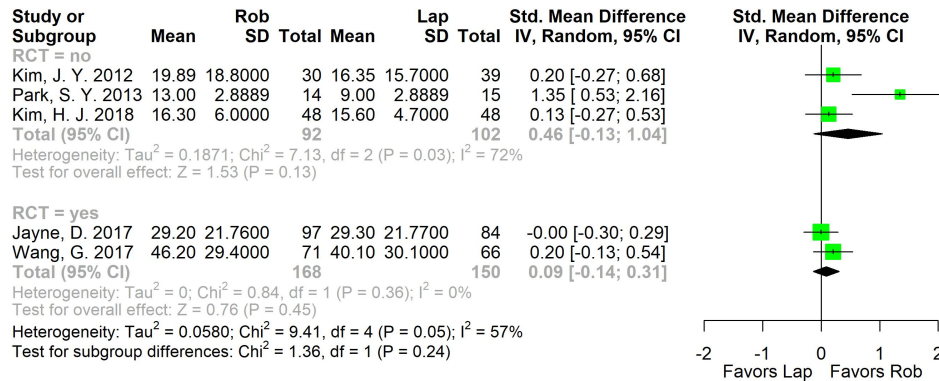

Figure 9: Forest plot for meta-analysis of IIEF at latest time point available, sorted by time of measurement from earliest to latest

Number of studies combined:  $k = 5$

|                      | SMD    | 95%-CI            | z    | p-value |
|----------------------|--------|-------------------|------|---------|
| Random effects model | 0.2375 | [-0.0491; 0.5242] | 1.62 | 0.1043  |

Quantifying heterogeneity:

$\tau^2 = 0.0580$ ;  $H = 1.53$  [1.00; 2.52];  $I^2 = 57.5\%$  [0.0%; 84.2%]

Quantifying residual heterogeneity:

$H = 1.63$  [1.00; 2.81];  $I^2 = 62.4\%$  [0.0%; 87.4%]

Test of heterogeneity:

| Q    | d.f. | p-value |
|------|------|---------|
| 9.41 | 4    | 0.0517  |

Results for subgroups (random effects model):

|           | k | SMD    | 95%-CI            | Q    | $\tau^2$ | $I^2$ |
|-----------|---|--------|-------------------|------|----------|-------|
| RCT = no  | 3 | 0.4571 | [-0.1287; 1.0429] | 7.13 | 0.1871   | 72.0% |
| RCT = yes | 2 | 0.0852 | [-0.1353; 0.3057] | 0.84 | 0        | 0.0%  |

Test for subgroup differences (random effects model):

|                | Q    | d.f. | p-value |
|----------------|------|------|---------|
| Between groups | 1.36 | 1    | 0.2442  |

Details on meta-analytical method:

- Inverse variance method
- DerSimonian-Laird estimator for  $\tau^2$
- Hedges' g (bias corrected standardised mean difference)

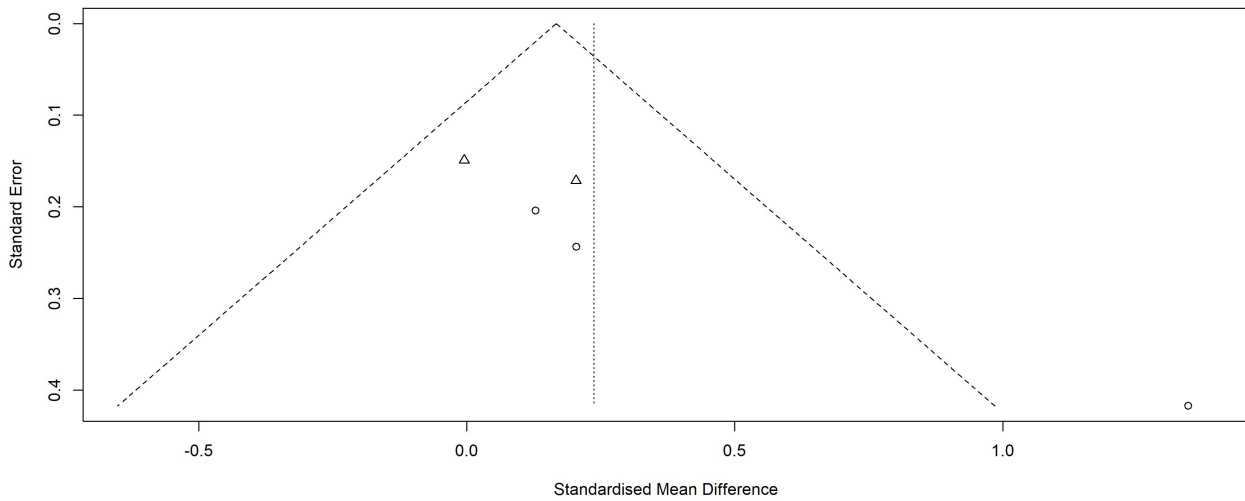

Figure 10: Funnel plot for meta-analysis of IIEF at latest time point available, sorted by time of measurement from earliest to latest

### 5 IPSS Total Scores

Robotic treatment (experimental group) compared to laproscopic treatment (control group). Results as mean differences and assuming a lower score to be better. Assuming that the data is asymptotically normal (especially symmetric) in the studies reporting median and range, mean and standard deviation are estimated.

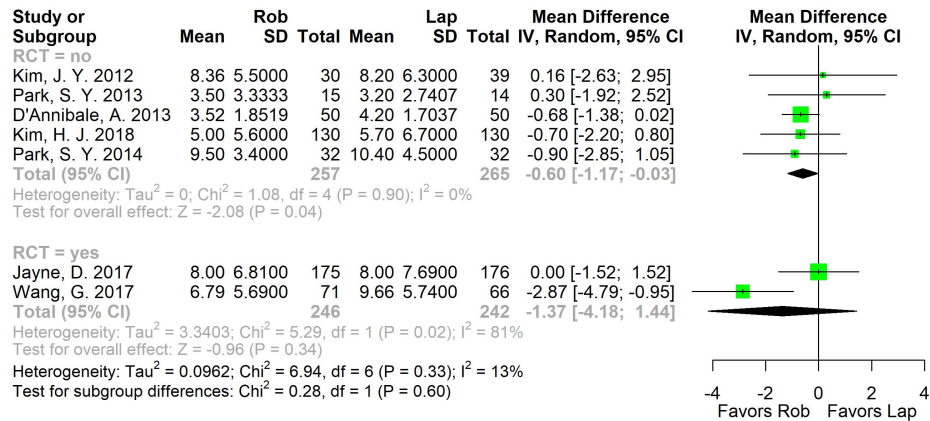

Figure 11: Forest plot for meta-analysis of IPSS at latest time point available, sorted by time of measurement from earliest to latest

Number of studies combined: k = 7

|                      | MD      | 95%-CI             | z     | p-value |
|----------------------|---------|--------------------|-------|---------|
| Random effects model | -0.7019 | [-1.3081; -0.0957] | -2.27 | 0.0232  |

Quantifying heterogeneity:

$\tau^2 = 0.0962$ ;  $H = 1.08$  [1.00; 1.99];  $I^2 = 13.5\%$  [0.0%; 74.7%]

Quantifying residual heterogeneity:

$H = 1.13$  [1.00; 1.71];  $I^2 = 21.5\%$  [0.0%; 65.9%]

Test of heterogeneity:

| Q    | d.f. | p-value |
|------|------|---------|
| 6.94 | 6    | 0.3268  |

Results for subgroups (random effects model):

|           | k | MD      | 95%-CI             | Q    | $\tau^2$ | $I^2$ |
|-----------|---|---------|--------------------|------|----------|-------|
| RCT = no  | 5 | -0.6020 | [-1.1706; -0.0335] | 1.08 | 0        | 0.0%  |
| RCT = yes | 2 | -1.3733 | [-4.1832; 1.4367]  | 5.29 | 3.3403   | 81.1% |

Test for subgroup differences (random effects model):

|                | Q    | d.f. | p-value |
|----------------|------|------|---------|
| Between groups | 0.28 | 1    | 0.5980  |

Details on meta-analytical method:

- Inverse variance method
- DerSimonian-Laird estimator for  $\tau^2$

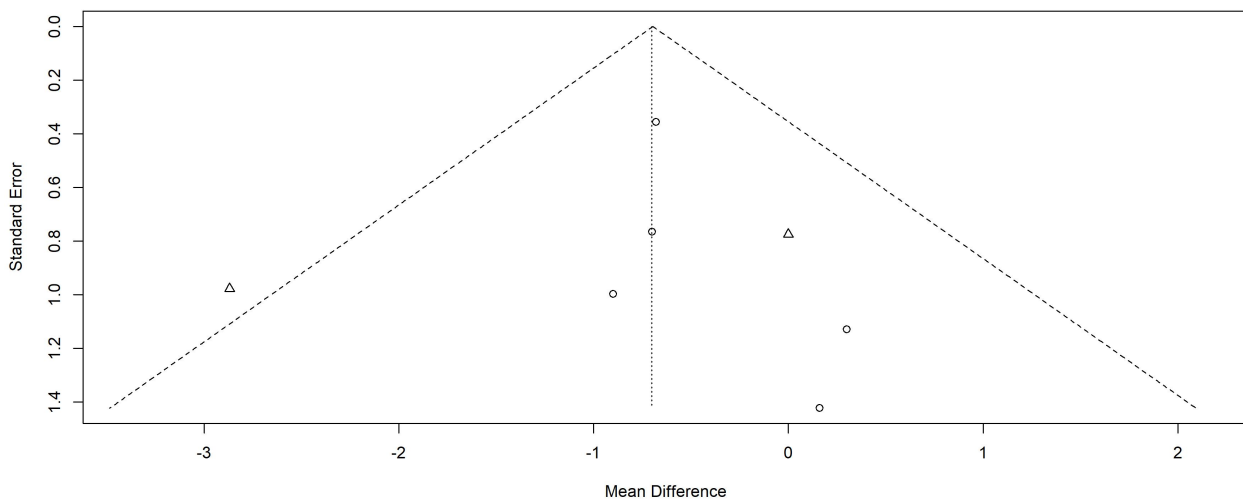

Figure 12: Funnel plot for meta-analysis of IPSS at latest time point available, sorted by time of measurement from earliest to latest

## 6 Session Information

R version 3.5.1 (2018-07-02)  
Platform: x86\_64-w64-mingw32/x64 (64-bit)  
Running under: Windows 10 x64 (build 17134)

Matrix products: default

locale:

[1] LC\_COLLATE=German\_Germany.1252 LC\_CTYPE=German\_Germany.1252  
[3] LC\_MONETARY=German\_Germany.1252 LC\_NUMERIC=C  
[5] LC\_TIME=German\_Germany.1252

attached base packages:

[1] stats graphics grDevices utils datasets methods base

other attached packages:

[1] readxl\_1.1.0 meta\_4.9-2 forcats\_0.3.0 stringr\_1.3.1  
[5] dplyr\_0.8.0.1 purrr\_0.2.5 readr\_1.1.1 tidyr\_0.8.2  
[9] tibble\_2.1.1 ggplot2\_3.1.0 tidyverse\_1.2.1

loaded via a namespace (and not attached):

[1] Rcpp\_1.0.0 cellranger\_1.1.0 pillar\_1.3.1 compiler\_3.5.1  
[5] plyr\_1.8.4 tools\_3.5.1 digest\_0.6.18 lubridate\_1.7.4  
[9] jsonlite\_1.5 evaluate\_0.12 nlme\_3.1-137 gtable\_0.2.0  
[13] lattice\_0.20-35 pkgconfig\_2.0.2 rlang\_0.3.4 cli\_1.0.1  
[17] rstudioapi\_0.8 yaml\_2.2.0 haven\_1.1.2 withr\_2.1.2  
[21] xml2\_1.2.0 httr\_1.3.1 knitr\_1.20 hms\_0.4.2  
[25] rprojroot\_1.3-2 imbiReport\_0.1.0 grid\_3.5.1 tidyselect\_0.2.5  
[29] glue\_1.3.0 R6\_2.3.0 rmarkdown\_1.10 modelr\_0.1.2  
[33] magrittr\_1.5 codetools\_0.2-15 backports\_1.1.2 scales\_1.0.0  
[37] htmltools\_0.3.6 rvest\_0.3.2 assertthat\_0.2.0 colorspace\_1.3-2  
[41] stringi\_1.2.4 lazyeval\_0.2.1 munsell\_0.5.0 broom\_0.5.0  
[45] crayon\_1.3.4
