# Supplementary material for: Functional outcomes after laparoscopic versus robotic-assisted rectal resection: a systematic review and meta-analysis
Source: Springer Nature journal article supplement (doi:10.1007/s00464-019-07361-1), 2020-02-05
Supplement: MOESM3 [file 17633742]

**Summary of findings:**

**Robotic-assisted surgery compared to laparoscopic surgery for rectal cancer surgery**

**Patient or population:** rectal cancer surgery

**Setting:**

**Intervention:** Robotic-assisted surgery

**Comparison:** laparoscopic surgery

| Outcomes                                | Anticipated absolute effects* (95% CI) |                                                          | Relative effect (95% CI)         | No of participants (studies)        | Certainty of the evidence (GRADE) | Comments                                                                        |
|-----------------------------------------|----------------------------------------|----------------------------------------------------------|----------------------------------|-------------------------------------|-----------------------------------|---------------------------------------------------------------------------------|
|                                         | Risk with laparoscopic surgery         | Risk with Robotic-assisted surgery                       |                                  |                                     |                                   |                                                                                 |
| Ileus                                   | 117 per 1.000                          | <b>103 per 1.000</b><br>(91 to 115)                      | <b>OR 0.86</b><br>(0.75 to 0.98) | 21202<br>(31 observational studies) | ⊕⊕○○<br>LOW                       | Lower OR indicates lower rate of ileus retention for robotic-assisted surgery   |
| Urinary retention                       | 43 per 1.000                           | <b>28 per 1.000</b><br>(20 to 39)                        | <b>OR 0.65</b><br>(0.46 to 0.92) | 4469<br>(19 observational studies)  | ⊕⊕⊕○<br>MODERATE                  | Lower OR indicates lower rate of urinary retention for robotic-assisted surgery |
| Sexual function assessed with: IEEF     | -                                      | <b>SMD 0.46 SD higher</b><br>(0.13 lower to 1.04 higher) | -                                | 194<br>(5 observational studies)    | ⊕○○○<br>VERY LOW <sup>a</sup>     | Higher score indicates better function for robotic-assisted surgery             |
| Urinary symptoms assessed with: IPSS    | -                                      | <b>MD 0.6 fewer</b><br>(1.17 fewer to 0.03 fewer)        | -                                | 522<br>(7 observational studies)    | ⊕○○○<br>VERY LOW <sup>a</sup>     | Lower score indicates less urinary symptoms for robotic-assisted surgery        |
| Quality of Life assessed with: QLQ-C-30 | -                                      | <b>MD 2.99 higher</b><br>(2.02 higher to 3.95 higher)    | -                                | 308<br>(3 observational studies)    | ⊕○○○<br>VERY LOW <sup>a</sup>     | Higher score indicates higher quality of life for robotic-assisted surgery      |

\***The risk in the intervention group** (and its 95% confidence interval) is based on the assumed risk in the comparison group and the **relative effect** of the intervention (and its 95% CI).

**CI:** Confidence interval; **OR:** Odds ratio; **SMD:** Standardised mean difference; **MD:** Mean difference

**GRADE Working Group grades of evidence**

**High certainty:** We are very confident that the true effect lies close to that of the estimate of the effect

**Moderate certainty:** We are moderately confident in the effect estimate: The true effect is likely to be close to the estimate of the effect, but there is a possibility that it is substantially different

**Low certainty:** Our confidence in the effect estimate is limited: The true effect may be substantially different from the estimate of the effect

**Very low certainty:** We have very little confidence in the effect estimate: The true effect is likely to be substantially different from the estimate of effect

**Explanations**

a. subjective questionnaire
